# Supplementary material for: Inferring Phylogenies from RAD Sequence Data
Source: PLoS One. 2012 Apr 6;7(4):e33394. doi: 10.1371/journal.pone.0033394 (PMC3320897; doi:10.1371/journal.pone.0033394)
Supplement: Table S1 — Accuracy of Drosophila trees reconstructed from RAD data of known orthology and alignment. (XLS) [file pone.0033394.s004.xls]

## Sheet: TableS1
Table S1. Accuracy of Drosophila trees reconstructed from RAD data of known orthology and alignment.
Read length	Restriction enzme	Minimum taxa	Matrix length	#Parsimony informative sites	#Variable sites	#Correct nodes	#Correct nodes with bootstrap support > 70	#Incorrect nodes with bootstrap support > 70
100	NOT1	4	145600	6831	20754	9	8	0
100	NOT1	6	37200	3507	8246	9	8	0
100	NOT1	9	5400	874	1692	9	8	0
100	SBF1	4	259000	16836	46342	9	9	0
100	SBF1	6	91200	10868	22507	9	9	0
100	SBF1	9	15600	2486	4752	9	9	0
50	NOT1	4	73000	3252	9568	8	8	0
50	NOT1	6	18600	1663	3633	9	8	0
50	NOT1	9	2700	380	681	9	8	0
50	SBF1	4	129600	8157	22025	9	9	0
50	SBF1	6	45600	5169	10479	9	9	0
50	SBF1	9	7800	1194	2193	9	9	0
#Variable sites is the number of positions in the aligned matrix that differ in at least one taxon. Matrix length is the length of the entire concatenated supermatrix. #Correct nodes is the number correct nodes recovered out of nine nodes in the tree.
