# Supplementary material for: Inferring Phylogenies from RAD Sequence Data
Source: PLoS One. 2012 Apr 6;7(4):e33394. doi: 10.1371/journal.pone.0033394 (PMC3320897; doi:10.1371/journal.pone.0033394)
Supplement: Table S3 — Details of the data and the accuracy of the resulting trees for every supermatrix of mammal sequences. (XLS) [file pone.0033394.s006.xls]

## Sheet: TableS4
Table S3. Details of the data and the accuracy of the resulting trees for every supermatrix of mammal sequences.
								#Empty sequence sites
Read length	Minimum taxa	%Similarity for clustering	Matrix length	#Clusters	#Correct nodes	#Correct nodes with bootstrap support > 70	#Incorrect nodes with bootstrap support > 70	Bos Taurus	Canis lupus familiaris	Cavia porcellus	Equus caballus	Homo sapiens	Macaca mulatta	Mus musculus	Oryctolagus cuniculus	Pan troglodytes	Pongo pygmaeus	Rattus norvegicus	%Overall matrix that is gaps
100	4	0.55	538058	4916	7	5	0	379958	374158	447958	419058	160858	215358	436058	385158	169358	181258	476558	56
100	4	0.7	500313	4860	7	7	1	359313	386013	436413	402013	91913	137513	418813	389913	103613	102913	460213	55
100	4	0.9	306364	3043	7	5	0	252164	260664	285064	268564	28464	45164	279464	267564	33564	34364	293764	56
100	6	0.55	85528	766	6	6	1	38828	40128	60728	51928	19228	25628	52828	45528	20928	20528	67128	43
100	6	0.7	70790	681	6	6	1	26090	35290	49890	39990	9190	15890	41790	37690	12090	9790	57190	39
100	6	0.9	26840	266	7	6	0	10040	11740	19740	14040	1940	4940	17040	14140	2840	3840	22040	38
50	4	0.55	270886	4547	6	4	1	186336	171386	207386	192886	128036	150486	218036	166436	130686	140136	229736	59
50	4	0.7	247310	4833	6	5	0	178810	188760	214110	201760	44210	67760	205410	193460	50960	50660	226810	55
50	4	0.9	169756	3382	5	4	1	133756	140106	153856	144756	19906	30306	151006	142606	22856	22056	161256	55
50	6	0.55	44151	719	4	4	2	23951	22651	29651	26251	15901	17751	29501	21051	16801	16851	32901	48
50	6	0.7	58166	648	6	5	0	46316	49566	53316	51316	7566	22716	52466	50066	11166	12566	55116	59
50	6	0.9	29542	339	6	5	0	24192	24442	26934	25292	5192	12042	25642	25142	5442	6892	27942	59
