# Supplementary material for: Inferring Phylogenies from RAD Sequence Data
Source: PLoS One. 2012 Apr 6;7(4):e33394. doi: 10.1371/journal.pone.0033394 (PMC3320897; doi:10.1371/journal.pone.0033394)
Supplement: Table S5 — Results of Mann-Whitney tests for differences in bootstrap support between correct and incorrect nodes. (XLS) [file pone.0033394.s008.xls]

## Sheet: TableS5
Table S5. Results of Mann-Whitney tests for differences in bootstrap support between correct and incorrect nodes.
Tree subset	Node	P	U	Mean bootstrap	Mean incorrect bootstrap
NotI	1	0	89226	92.6	44.7
	2	0	87514	90.5	44.7
	3	0	36496	65.5	44.7
	4	0	77172	83	44.7
	5	0	84149	93.7	44.7
	6	0	95854	99.1	44.7
	7	0	72855	86.9	44.7
	8	0	82994	89.2	44.7
	9	0.116	32238	41.8	44.7
SbfI	1	0	81214	96.9	55.9
	2	0	82286	96.7	55.9
	3	0.0012	37492	63.1	55.9
	4	0	83162	96.8	55.9
	5	0	79461	93.9	55.9
	6	0	86464	98.6	55.9
	7	0	59758	81.9	55.9
	8	0	76046	92.8	55.9
	9	0	29768	80.6	55.9
100 bp	1	0	58155	94.5	51.2
	2	0	59294	94.2	51.2
	3	0	27529	61.3	51.2
	4	0	55494	89.2	51.2
	5	0	59868	96.4	51.2
	6	0	61965	99.3	51.2
	7	0	53724	92.2	51.2
	8	0	56823	93.4	51.2
	9	0	25323	62	51.2
50 bp	1	0	113807	94.9	49.3
	2	0	110573	93.1	49.3
	3	0	46548	67.5	49.3
	4	0	106048	91.1	49.3
	5	0	103701	91.3	49.3
	6	0	123339	98.4	49.3
	7	0	75791	76.2	49.3
	8	0	102702	88.7	49.3
	9	0.5993	33342	51.2	49.3
Min. taxa 4	1	0	34262	94.7	45.9
	2	0	33640	93.9	45.9
	3	0	15970	62.8	45.9
	4	0	33426	98.2	45.9
	5	0	31882	95.2	45.9
	6	0	35130	98.1	45.9
	7	0	26175	82.5	45.9
	8	0	31999	91.3	45.9
	9	0.1874	12440	53.4	45.9
Min. taxa 6	1	0	33020	95.5	43.9
	2	0	32579	95.3	43.9
	3	0	16118	63.7	43.9
	4	0	29566	86.2	43.9
	5	0	31570	94.6	43.9
	6	0	33621	99.5	43.9
	7	0	25737	85.3	43.9
	8	0	29278	88.7	43.9
	9	0	14525	63.6	43.9
Min. taxa 9	1	0	43616	93.9	56.5
	2	0	44331	91.6	56.5
	3	0.0049	15982	66.6	56.5
	4	0	41977	85.7	56.5
	5	0	44560	91.4	56.5
	6	0	52338	98.9	56.5
	7	0	36527	85.6	56.5
	8	0	43913	93.1	56.5
	9	0.4153	12178	53	56.5
Cluster similarity 50%	1	0	3230	96.8	60.8
	2	0	3204	95.3	60.8
	3	0	2675	88.9	60.8
	4	0	3059	91.7	60.8
	5	0	2584	83.9	60.8
	6	0	3461	98.9	60.8
	7	0	1895	84.9	60.8
	8	0	2942	95.7	60.8
	9	0.0229	1277	75.3	60.8
Cluster similarity 55%	1	0	1344	99.1	67.6
	2	0	1303	98.4	67.6
	3	0	1077	90.4	67.6
	4	0	1281	96.6	67.6
	5	0	1293	96.8	67.6
	6	0	1370	99.7	67.6
	7	0	1199	92.7	67.6
	8	0	1378	100	67.6
	9	0.1596	610	76.4	67.6
Cluster similarity 60%	1	0	1764	99.8	70.9
	2	0	1761	99.8	70.9
	3	0.0208	1037	74.4	70.9
	4	0	1714	98.5	70.9
	5	0	1769	100	70.9
	6	0	1764	99.9	70.9
	7	0	1599	94.4	70.9
	8	0	1743	98.8	70.9
	9	0.3102	448	57.2	70.9
Cluster similarity 65%	1	0	2696	100	67.3
	2	0	2658	99.5	67.3
	3	0.0107	1101	78.2	67.3
	4	0	2550	96.8	67.3
	5	0	2536	96.9	67.3
	6	0	2700	100	67.3
	7	0	2293	91.8	67.3
	8	0	2699	100	67.3
	9	0.1505	754	56.4	67.3
Cluster similarity 70%	1	0	2992	99.8	72
	2	0	2996	99.7	72
	3	0.9562	831	65.6	72
	4	0	2897	98.4	72
	5	0	2905	98.1	72
	6	0	3030	100	72
	7	0	2467	89.9	72
	8	0	3018	99.9	72
	9	0.0358	739	52.8	72
Cluster similarity 75%	1	0	3113	99.3	67.3
	2	0	3078	99.2	67.3
	3	0.0133	544	45.3	67.3
	4	0	2746	91.1	67.3
	5	0	3200	100	67.3
	6	0	3203	100	67.3
	7	0	2627	91.4	67.3
	8	0	2950	96.4	67.3
	9	0.0091	732	45.9	67.3
Cluster similarity 80%	1	0	2818	98.3	60.4
	2	0	2811	97.8	60.4
	3	0	238	21.2	60.4
	4	0	2425	84.3	60.4
	5	0	2952	99.6	60.4
	6	0	2974	99.6	60.4
	7	0	2322	86.5	60.4
	8	0	2695	92.9	60.4
	9	0.014	759	44.5	60.4
Cluster similarity 85%	1	0	3460	91.3	46.5
	2	0	3741	89.7	46.5
	3	0.0011	607	25.7	46.5
	4	0	3285	78.5	46.5
	5	0	3724	89.1	46.5
	6	0	4048	99.6	46.5
	7	0	2568	66.9	46.5
	8	0	3242	80.3	46.5
	9	0.799	1245	49.9	46.5
Cluster similarity 90%	1	0	5372	81.9	35.9
	2	0	5455	76.5	35.9
	3	0.5909	1643	38.3	35.9
	4	0	5478	78.4	35.9
	5	0	4846	79.5	35.9
	6	0	6174	97.6	35.9
	7	0.0026	2649	53.7	35.9
	8	0	3839	59.1	35.9
	9	0.0091	1455	55.8	35.9
Cluster similarity 95%	1	0	3846	62.5	28.5
	2	0	2953	57.4	28.5
	3	0.5313	1032	32.7	28.5
	4	0	1891	71.9	28.5
	5	0	2406	79.6	28.5
	6	0	5236	88.9	28.5
	7	0.3272	492	26.6	28.5
	8	0	2334	54.1	28.5
	9	0.0109	1148	55.2	28.5
All trees	1	0	339688	94.7	50
	2	0	337728	93.6	50
	3	0	149582	64.1	50
	4	0	320075	90.2	50
	5	0	328599	93.8	50
	6	0	364964	98.8	50
	7	0	267276	84.4	50
	8	0	318104	91	50
	9	0.0027	122504	57	50
Tree subset indicates the set of trees that was examined for each test. We compared the support at the correct nodes with the support at all incorrect nodes in the given subset. Nodes are defined by ingroup taxa. Node 1 ingroup: D. simulans + D. sechellia. Node 2 ingroup: Node 1 + D. melanogaster. Node 3: D. yakuba + D. erecta. Node 4: Node 2 + Node 3. Node 5: Node 4 + D. ananassae. Node 6: D. ps…
