# Supplementary material for: Inferring Phylogenies from RAD Sequence Data
Source: PLoS One. 2012 Apr 6;7(4):e33394. doi: 10.1371/journal.pone.0033394 (PMC3320897; doi:10.1371/journal.pone.0033394)
Supplement: Table S6 — Phylogenetic accuracy for 100 randomized replicates of a subset of parameters. (XLS) [file pone.0033394.s009.xls]

## Sheet: TableS5
Table S6. Phylogenetic accuracy for 100 replicates of subset of parameters.
				#Trees recovered with given number of correct nodes
Read length	Restriction enzyme	Minimum taxa	%Similarity for clustering	1	2	3	4	5	6	7	8	9
100	SBF1	4	0.5	0	0	0	0	0	0	0	24	76
100	SBF1	4	0.55	0	0	0	0	0	0	0	11	89
100	SBF1	4	0.6	0	0	0	0	0	0	0	64	36
100	SBF1	4	0.65	0	0	0	0	0	0	0	43	57
100	SBF1	4	0.7	0	0	0	0	0	0	0	23	77
100	SBF1	4	0.75	0	0	0	0	0	0	0	4	96
100	SBF1	4	0.8	0	0	0	0	0	0	0	7	93
100	SBF1	4	0.85	0	0	0	0	0	0	1	22	77
100	SBF1	4	0.9	0	0	0	0	1	12	17	68	2
100	SBF1	4	0.95	5	0	17	8	5	3	2	0	0
50	NOT1	9	0.5	2	16	12	23	21	16	8	2	0
50	NOT1	9	0.55	0	0	0	1	3	5	21	38	32
50	NOT1	9	0.6	0	0	0	0	0	0	1	28	71
50	NOT1	9	0.65	0	0	0	0	0	0	1	69	30
50	NOT1	9	0.7	0	0	0	0	0	0	2	80	18
50	NOT1	9	0.75	0	0	0	0	0	0	0	72	28
50	NOT1	9	0.8	0	0	0	0	0	0	0	88	12
50	NOT1	9	0.85	0	0	0	0	3	15	6	64	12
50	NOT1	9	0.9	0	0	0	5	39	31	22	3	0
50	NOT1	9	0.95	0	9	11	51	27	2	0	0	0
All sets of parameters do not show results from 100 replicates because matrices were sometimes completely empty for one or more taxa. Trees were not reconstructed from these matrices.
